# Supplementary material
Source: PubMed Central journal article supplement (PMC8815506)
Supplement: KID.0002602020SupplementaryData.pdf [file KID.0002602020SupplementaryData.pdf]

**Supplementary Table:** Distribution of registered cases by Regions

| <b>Region</b>      | <b>Porcentaje (%)</b> | <b>pmp</b>  |
|--------------------|-----------------------|-------------|
| Madrid             | 36                    | 75.5        |
| Castilla La Mancha | 9.0                   | 61.9        |
| La Rioja           | 1.3                   | 59.9        |
| Navarra            | 2.5                   | 53.5        |
| Cataluña           | 19.6                  | 35.6        |
| País Vasco         | 5.2                   | 32.6        |
| Castilla y León    | 4.9                   | 28.7        |
| Cantabria          | 1.1                   | 25.8        |
| Aragón             | 1.7                   | 18.2        |
| Extremadura        | 1.4                   | 17.8        |
| Valencia           | 4.7                   | 13.2        |
| Andalucía          | 7.7                   | 12.8        |
| Balearic Islands   | 1.0                   | 12.2        |
| Galicia            | 2.1                   | 11.1        |
| Asturias           | 0.6                   | 7.8         |
| Canary Islands     | 0.9                   | 6.0         |
| Murcia             | 0.2                   | 2           |
| <b>Spain</b>       | <b>100</b>            | <b>29.7</b> |

pmp: per million population
